# Supplementary material for: Excitation–emission matrix spectroscopy coupled with chemometrics for monitoring ozonation of olive oil and olive pomace oil
Source: Royal Society of Chemistry journal article supplement (doi:10.1039/d4ay02267j), 2025-01-01
Supplement: d4ay02267j1.pdf [file d4ay02267j1.pdf]

## Supplementary material

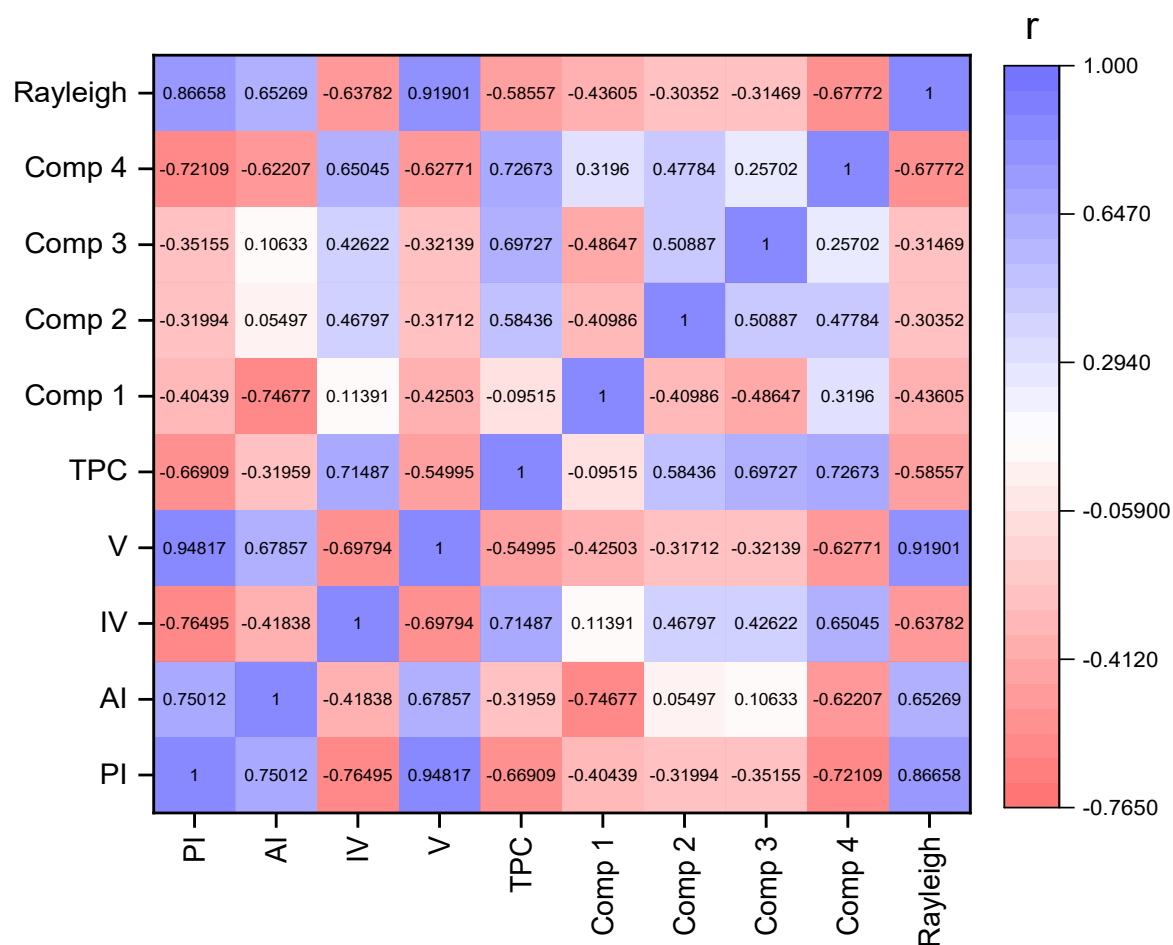

**Figure S1.** Heat map of Pearson correlation coefficients for peroxide index (PI), acidity index (AI), iodine value (IV), total polyphenol content (TPC), viscosity (V); score values of four fluorescent components extracted using PARAFAC (Comp 1, Comp 2, Comp 3, Comp 4), and intensity of Rayleigh scattering signal (Rayleigh) for all virgin (VOO) and pomace (POO) olive oil samples studied (n=84).

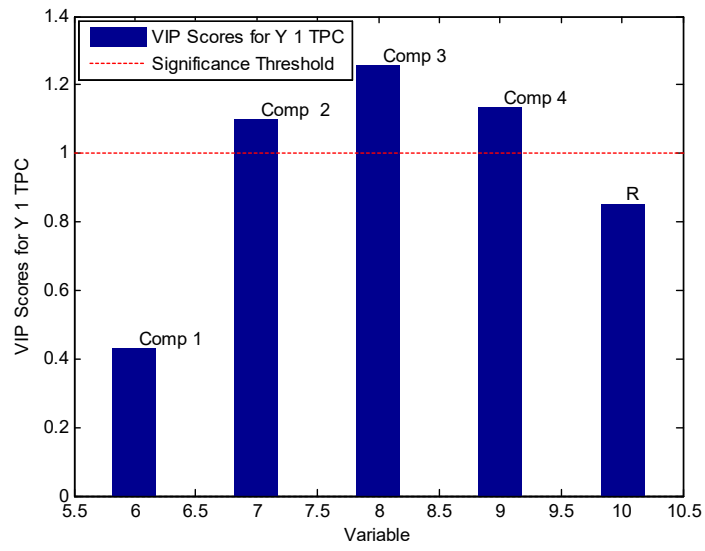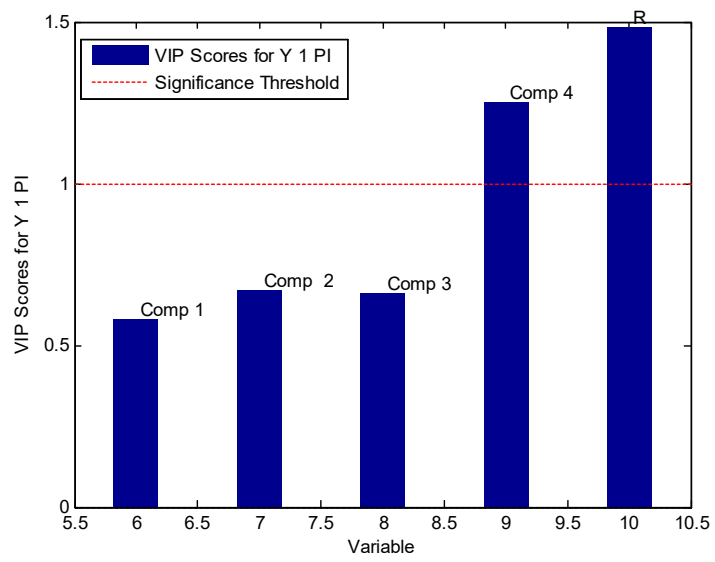

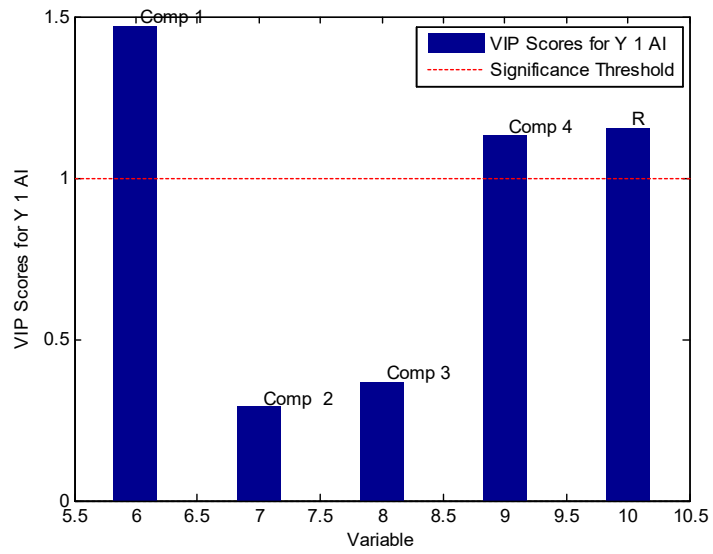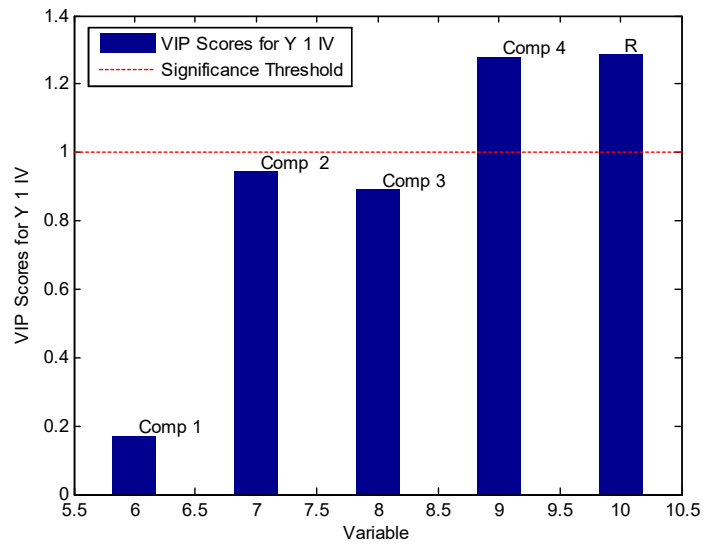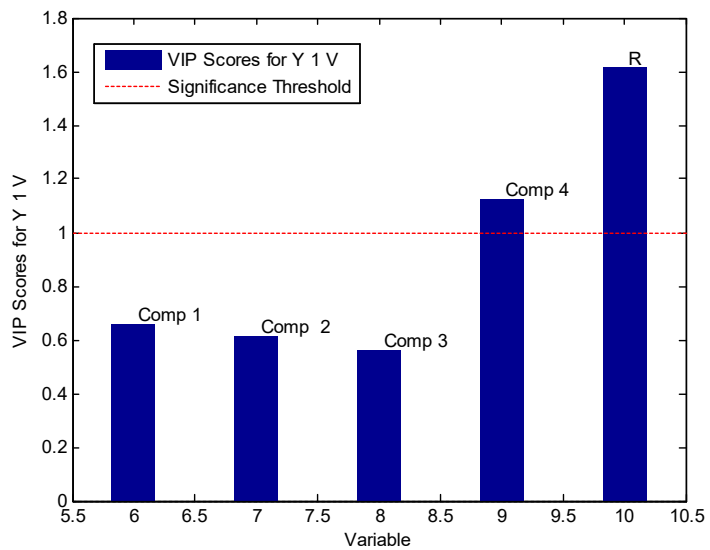

**Figure S2.** VIP for PLS-PARAFAC-R models for total polyphenol content (TPC), peroxide index (PI), acidity index (AI), iodine value (IV), viscosity (V). Score values of four fluorescent components extracted using PARAFAC (Comp 1, Comp 2, Comp 3, Comp 4), intensity of Rayleigh scattering signal (Rayleigh) (n=84).
